# Supplementary material
Source: PubMed Central journal article supplement (PMC2117269)
Supplement: thorax_62_8_723__1.pdf [file thorax_62_8_723__1.pdf]

**Table 1** Prevention of respiratory exacerbations in cystic fibrosis

| Approach                    | Agents                                                           | Evidence/study type*                                                                                                                                                                       | Summary of results                                                                                                                                                                                                                                                                                                                                                                                                                                                                                                           | Notes                                                                                                                                                                                                                                                                                                                                                                                                                                                                                                                                                                |
|-----------------------------|------------------------------------------------------------------|--------------------------------------------------------------------------------------------------------------------------------------------------------------------------------------------|------------------------------------------------------------------------------------------------------------------------------------------------------------------------------------------------------------------------------------------------------------------------------------------------------------------------------------------------------------------------------------------------------------------------------------------------------------------------------------------------------------------------------|----------------------------------------------------------------------------------------------------------------------------------------------------------------------------------------------------------------------------------------------------------------------------------------------------------------------------------------------------------------------------------------------------------------------------------------------------------------------------------------------------------------------------------------------------------------------|
| Mucolytic agents            | N-Acetylcysteine<br>rhDNase                                      | Systematic review <sup>28</sup><br>Three RCTs <sup>29-32</sup>                                                                                                                             | Exacerbation reduction not directly measured in trials<br>Reduction in exacerbations seen in several trials involving different patient groups                                                                                                                                                                                                                                                                                                                                                                               |                                                                                                                                                                                                                                                                                                                                                                                                                                                                                                                                                                      |
| Physiotherapy and exercise  | Hypertonic saline<br>PEP                                         | One long-term RCT <sup>36</sup><br>One study examining postural drainage/percussion and the forced expiratory technique with the effect of forced expiratory technique alone <sup>39</sup> | Reduction in exacerbations<br>No difference in rate of hospital admissions                                                                                                                                                                                                                                                                                                                                                                                                                                                   |                                                                                                                                                                                                                                                                                                                                                                                                                                                                                                                                                                      |
|                             | Flutter                                                          | Flutter device compared with physiotherapy with PEP mask in 40 children with CF over a 12 month period <sup>40</sup>                                                                       | A significant increase in rate of hospital admissions in flutter treated group                                                                                                                                                                                                                                                                                                                                                                                                                                               |                                                                                                                                                                                                                                                                                                                                                                                                                                                                                                                                                                      |
|                             | Exercise                                                         | One trial aerobic training <sup>41</sup><br>One trial anaerobic training <sup>42</sup>                                                                                                     | No effect on exacerbation rate from aerobic training<br>Exacerbation rate not analysed in anaerobic trial                                                                                                                                                                                                                                                                                                                                                                                                                    |                                                                                                                                                                                                                                                                                                                                                                                                                                                                                                                                                                      |
| Antibiotics                 | Antistaphylococcal treatment                                     | Cochrane review <sup>23</sup>                                                                                                                                                              | No difference in proportion of patients admitted to hospital                                                                                                                                                                                                                                                                                                                                                                                                                                                                 | Respiratory exacerbations not defined                                                                                                                                                                                                                                                                                                                                                                                                                                                                                                                                |
|                             | Initial treatment of <i>P aeruginosa</i>                         | Cochrane review <sup>26</sup>                                                                                                                                                              | Studies have not reported effect on respiratory exacerbations                                                                                                                                                                                                                                                                                                                                                                                                                                                                | Possible increase in rates of PsA infection<br>Ongoing studies will address whether early treatment of initial isolates of PsA will reduce respiratory exacerbations                                                                                                                                                                                                                                                                                                                                                                                                 |
|                             | Nebulised antibiotics                                            | Cochrane review <sup>22</sup>                                                                                                                                                              | Limited pooling possible to examine effect of respiratory exacerbations<br>Proportion requiring IV antibiotics reduced<br>Proportion requiring hospital admission reduced<br>Reduced days on IV antibiotics<br>Reduced in hospital days.                                                                                                                                                                                                                                                                                     | Generally well tolerated treatment                                                                                                                                                                                                                                                                                                                                                                                                                                                                                                                                   |
|                             | Macrolides                                                       | Cochrane review <sup>24</sup><br><br>Four RCTs (total n=369) of azithromycin; trial 3-12 months (3 parallel group, 1 crossover design) <sup>63-65 67</sup>                                 | Clear evidence from RCTs of a small but significant improvement in respiratory function following treatment with azithromycin<br>Proportion requiring IV antibiotics reduced <sup>64 66</sup><br><br>Proportion requiring hospital admission reduced <sup>64 66</sup><br><br>Reduced days on IV antibiotics† <sup>64-67</sup><br>Reduced in-hospital days <sup>64 66</sup><br><br>Reduced exacerbation episodes <sup>65 67</sup><br>Longer time to first exacerbation <sup>67</sup><br>Reduced oral courses <sup>63 67</sup> | Long-term effect on tobramycin susceptibility uncertain<br>Study by Clement not included in meta-analysis<br><br>Hospitalisation examined in different time scales (3 and 6 months); it was not possible to combine these data in a meta-analysis<br>Modest increase in azithromycin groups of primary trial end point (FEV <sub>1</sub> ) <sup>62-64</sup><br>Not all patients had chronic PsA infection <sup>62 64 66</sup><br>No evidence during trial of increased antibiotic resistance or disproportionate acquisition of "new" infections <sup>62-64 66</sup> |
|                             | Timing of antibiotic therapy                                     | One published RCT (n=60): patients randomised to two treatment arms (elective or symptomatic) and followed clinically at yearly reviews <sup>1,25</sup>                                    | No difference in exacerbation rates                                                                                                                                                                                                                                                                                                                                                                                                                                                                                          | Study design resulted in more IV antibiotics being administered to patients receiving elective than symptom-directed antibiotics                                                                                                                                                                                                                                                                                                                                                                                                                                     |
| Nutritional support         | Enteral supplementation                                          | No RCTs                                                                                                                                                                                    | Studies have not reported effect on respiratory exacerbations                                                                                                                                                                                                                                                                                                                                                                                                                                                                | Enteral feeding may lead to increased weight and possibly reduced rate of decline of lung function                                                                                                                                                                                                                                                                                                                                                                                                                                                                   |
| Neonatal screening          | Oral high energy supplementation<br>Newborn diagnostic screening | One published RCT <sup>82</sup><br>RCT on newborn screening <sup>83</sup>                                                                                                                  | Study did not report effect on respiratory exacerbations<br>Longitudinal study has not demonstrated lung function advantage or reduction in respiratory exacerbations                                                                                                                                                                                                                                                                                                                                                        | Nutritional and growth advantage in patients diagnosed by newborn screening                                                                                                                                                                                                                                                                                                                                                                                                                                                                                          |
| Anti-inflammatory treatment | Oral corticosteroids                                             | Cochrane review <sup>17</sup>                                                                                                                                                              | Studies have not reported effect on respiratory exacerbations                                                                                                                                                                                                                                                                                                                                                                                                                                                                | Increased side effects in oral steroid group                                                                                                                                                                                                                                                                                                                                                                                                                                                                                                                         |

Table 1 Continued

| Approach                        | Agents                                                                              | Evidence/study type*                                                                                                                                                                       | Summary of results                                                                                                                                                                                                                                                                                                                                                                                    | Notes                                                                                                                                                                                                                             |
|---------------------------------|-------------------------------------------------------------------------------------|--------------------------------------------------------------------------------------------------------------------------------------------------------------------------------------------|-------------------------------------------------------------------------------------------------------------------------------------------------------------------------------------------------------------------------------------------------------------------------------------------------------------------------------------------------------------------------------------------------------|-----------------------------------------------------------------------------------------------------------------------------------------------------------------------------------------------------------------------------------|
|                                 |                                                                                     | One published RCT (n = 285); prednisone 2 mg/kg or prednisone 1 mg/kg or placebo on alternate days (maximum dose 60 mg); primary analysis planned for after 4 years of study <sup>86</sup> | No difference in rates of hospitalisation in high-dose steroid, low-dose steroid or placebo groups                                                                                                                                                                                                                                                                                                    | An excess of adverse events resulted in the high-dose prednisolone (2 mg/kg on alternate days) being discontinued prematurely 3 years after accrual of participants commenced and the low dose was also discontinued 1 year later |
|                                 | Inhaled corticosteroids                                                             | Cochrane review <sup>14</sup><br>Subsequent RCT (n = 171): inhaled fluticasone withdrawal trial, 6 months duration <sup>88</sup>                                                           | No evidence of effect on respiratory exacerbation rates<br>Time to exacerbation not different between ICS withdrawal group vs ICS ongoing group<br>IV and oral antibiotic days and courses (treatment episodes) equivalent                                                                                                                                                                            | Patients with asthma and recent oral steroids excluded from recruitment<br>Post hoc subgroup analysis, effect on rate of decline of lung function confined to children aged 5–13 years                                            |
|                                 | NSAIDs                                                                              | Cochrane review <sup>19</sup><br><br>RCT (n = 85) ibuprofen (20–30 mg/kg/day) twice daily; study duration 4 years <sup>89</sup>                                                            | Details on effects of respiratory exacerbations not provided<br>Proportion of patients requiring hospitalisation in 12 months prior to study greater in ibuprofen group (27%) and this was stable in the final 12 months of the study (29%). Increase in placebo group in final 12 months of study (from 14% to 37%)<br>No difference in number of hospitalisation episodes or days spent in hospital | Low rates of prescription possibly related to gastrointestinal complications or need for ongoing drug level monitoring                                                                                                            |
|                                 | Leucotriene antagonists                                                             | Study published in abstract form <sup>93</sup>                                                                                                                                             | Increased respiratory exacerbations (adults)<br><br>Increased proportion of patients admitted to hospital with respiratory exacerbations (adults)<br>No data available                                                                                                                                                                                                                                | Safety monitoring committee prematurely terminated trial (420 of 600 recruited).<br>Adverse effects not seen in paediatric patients                                                                                               |
| Treatment of specific pathogens |                                                                                     | No RCTs                                                                                                                                                                                    |                                                                                                                                                                                                                                                                                                                                                                                                       | Many RCTs exclude patients with multiresistant bacterial infection (eg, BCC infection).                                                                                                                                           |
| Vaccinations                    | Influenza vaccination<br>Pneumococcal vaccination<br><i>Pseudomonas</i> vaccination | Cochrane review <sup>15</sup><br>No RCTs<br>One unpublished RCT (see citation in body of text)                                                                                             | No trials directly comparing vaccine with placebo<br>No data available<br>No effect on decreasing <i>Pseudomonas</i> colonisation                                                                                                                                                                                                                                                                     |                                                                                                                                                                                                                                   |

RCT, randomised controlled trial; PEP, positive expiratory pressure; PsA, *Pseudomonas aeruginosa*; IV, intravenous; NSAIDs, non-steroidal anti-inflammatory drugs; BCC, *Burkholderia cepacia* complex.

\*Specific RCTs highlighted in the table which have addressed aspects of respiratory exacerbations (including hospital episodes and treatment with intravenous antibiotics).

†Clement study: reduction in intravenous antibiotics for patients with PsA infection.
